# Supplementary material for: Kappa free light chain and neurofilament light independently predict early multiple sclerosis disease activity—a cohort study
Source: PubMed Central journal article supplement (PMC10148088; doi:10.1016/j.ebiom.2023.104573), 2023-04-20

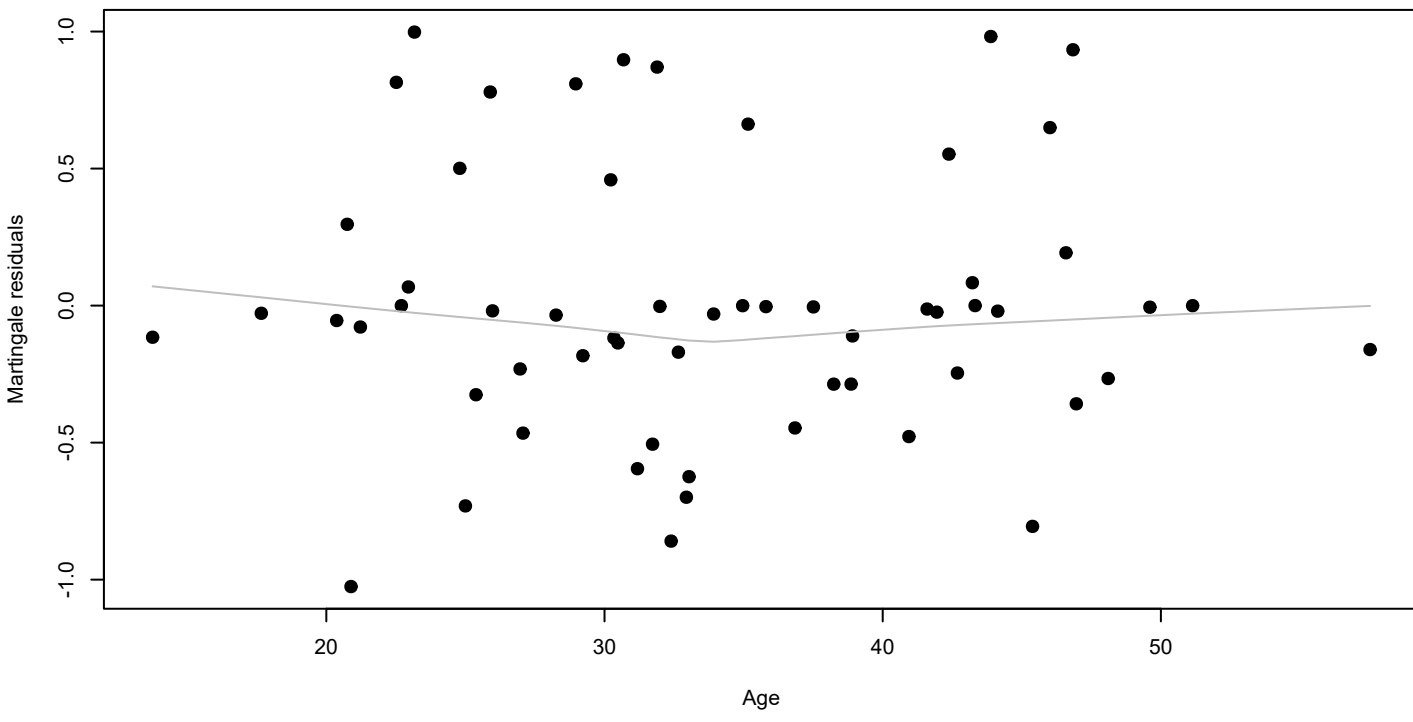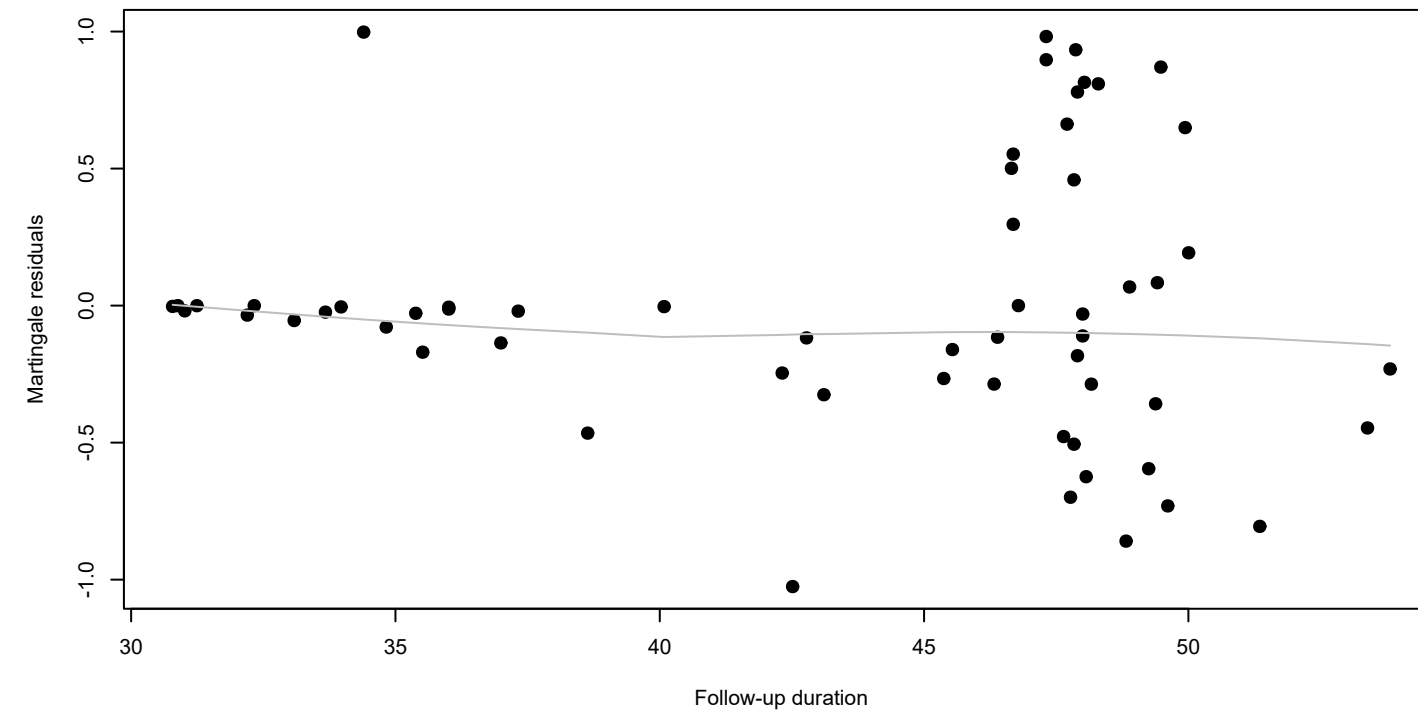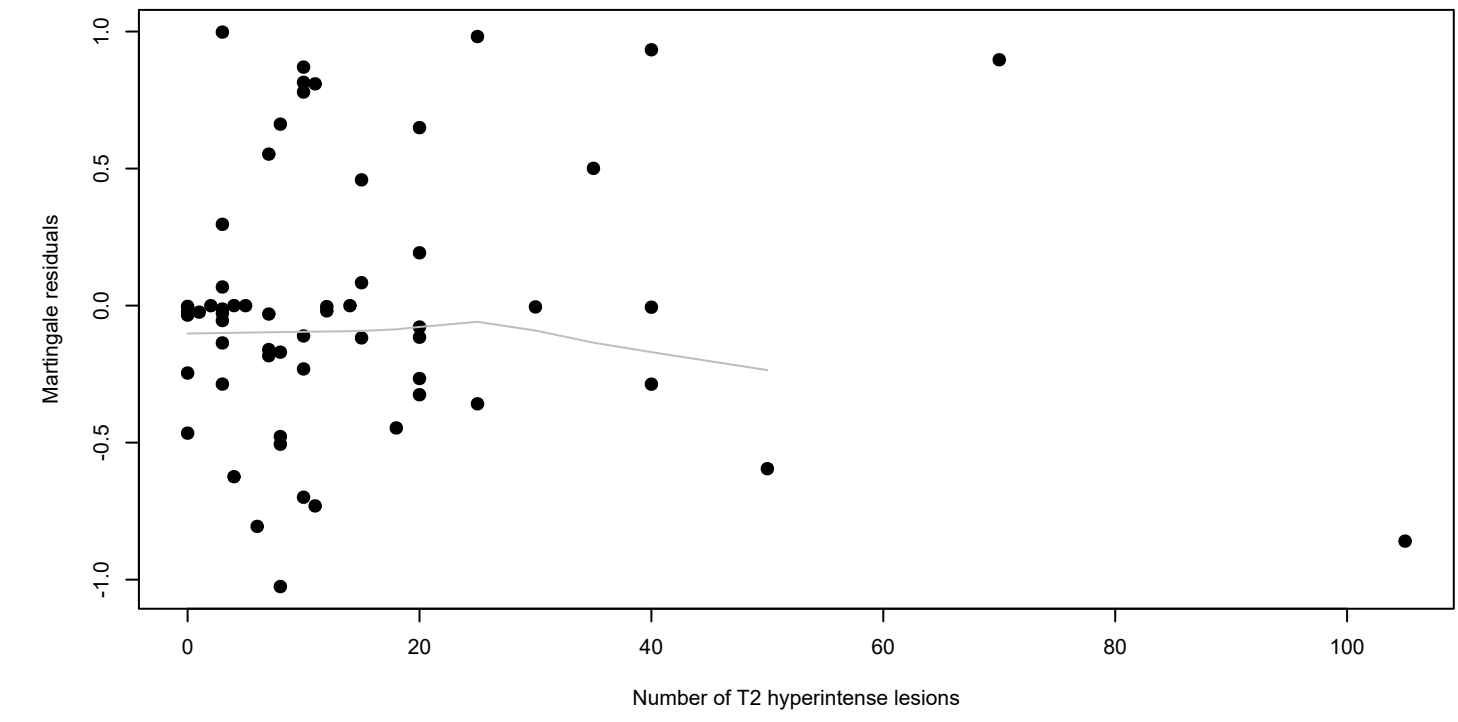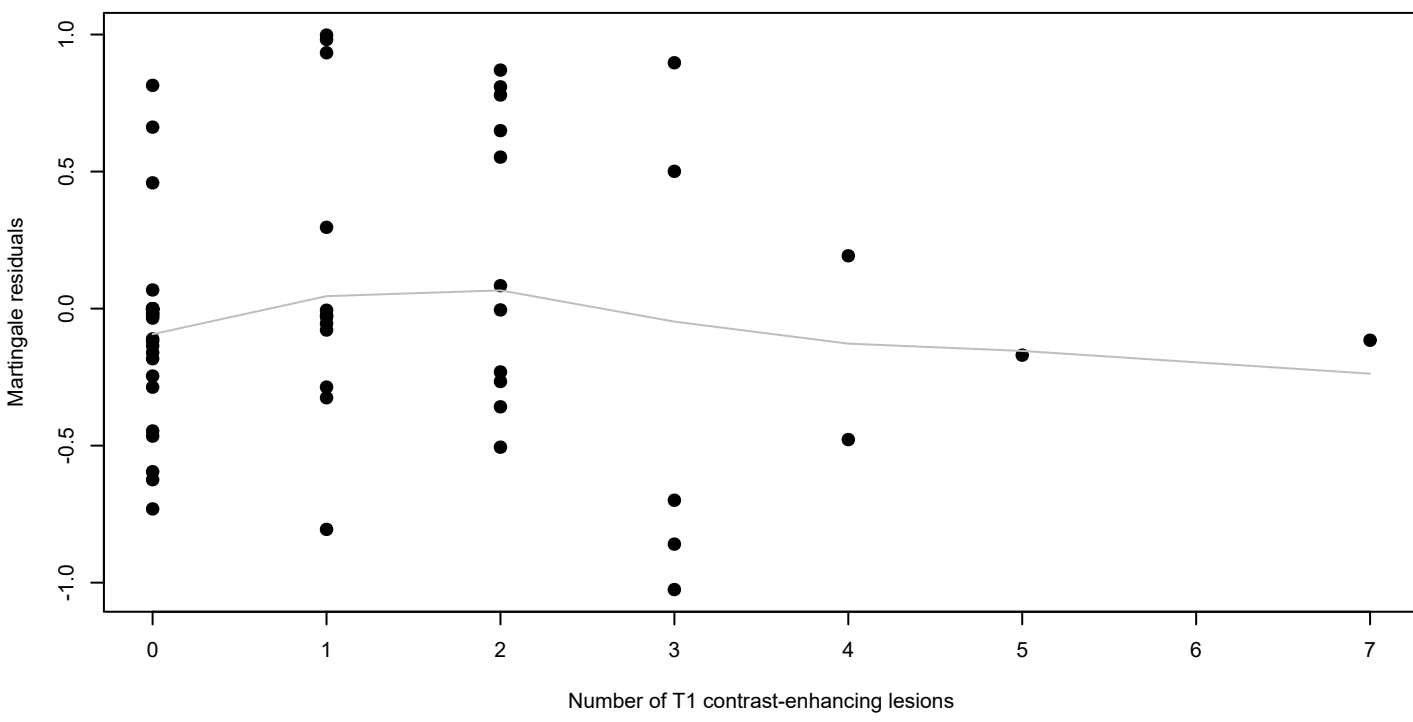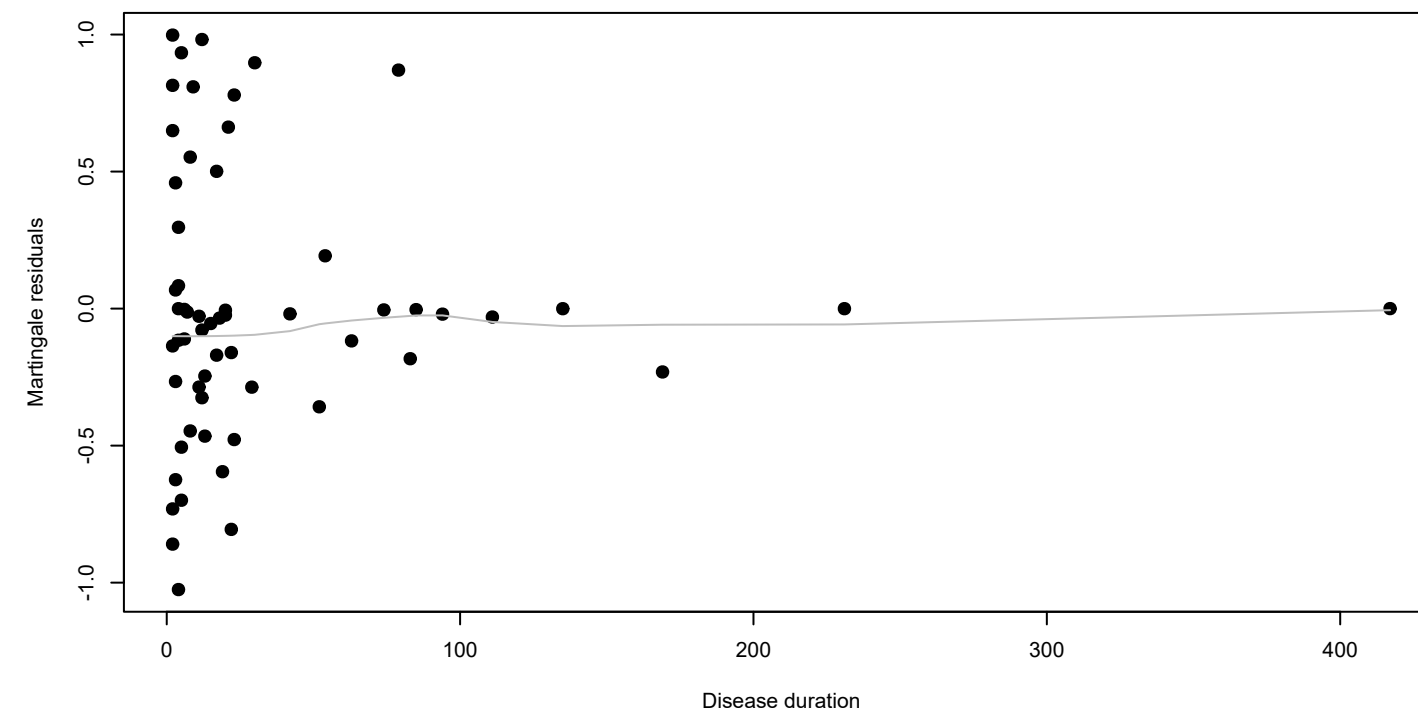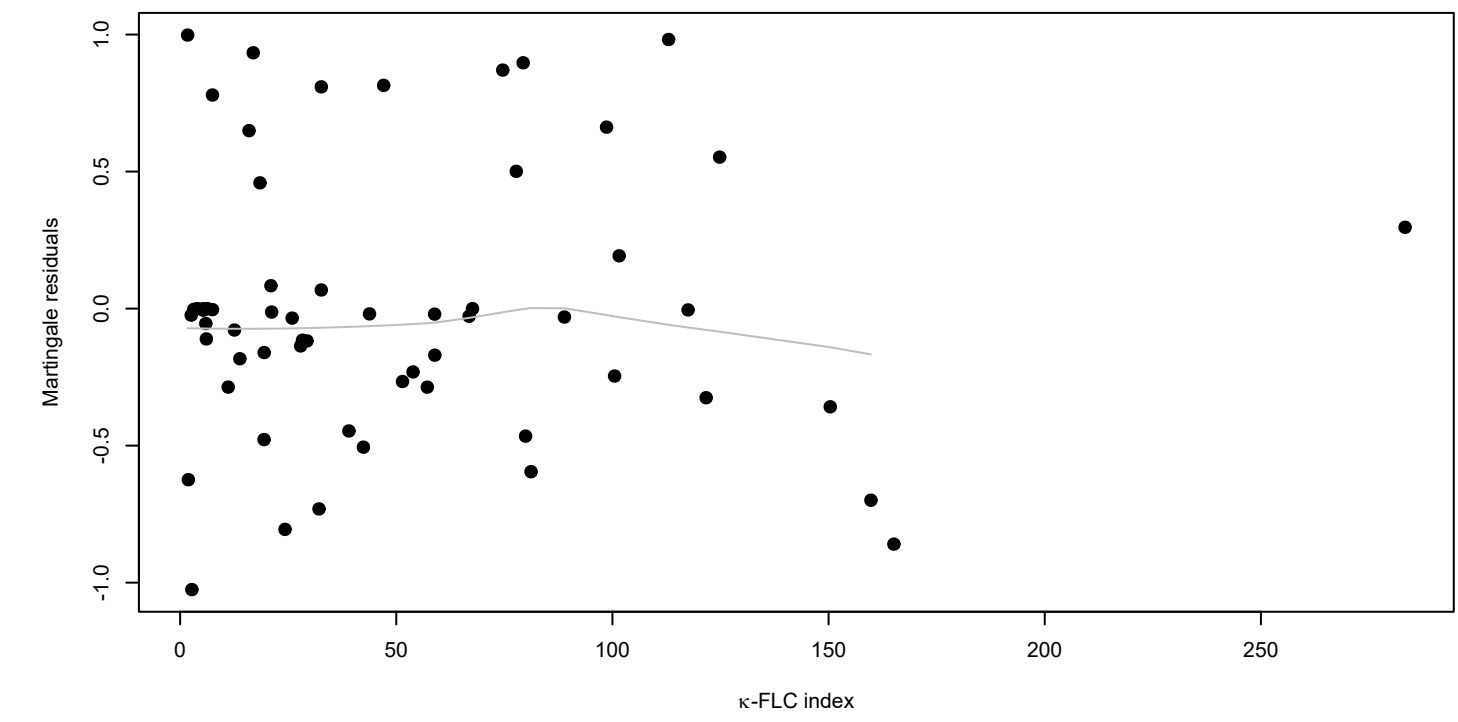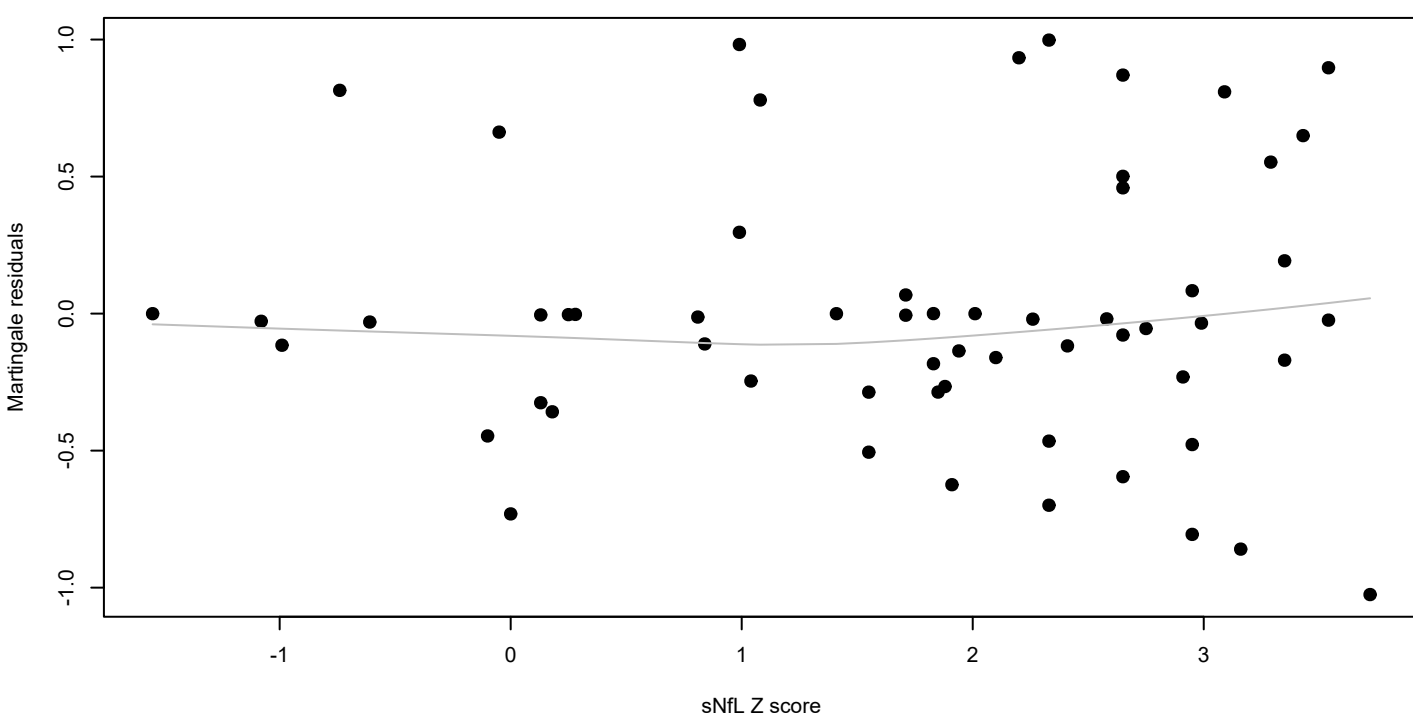

Supplement: mmc9.pdf [file mmc9.pdf]
